# Supplementary material for: Clinical efficacy of botulinum toxin type A in the treatment of fasciitis pain: A systematic review and meta-analysis
Source: PubMed Central journal article supplement (PMC10378743; doi:10.1097/md.0000000000034461), 2023-07-28
Supplement: medi-102-e34461-s001.pdf [file medi-102-e34461-s001.pdf]

**Pubmed:** [All Fields]( fasciitis OR fasciopathy OR chronic fasciitis OR lumbar back fasciitis OR neck and shoulder fasciitis OR Plantar fasciitis OR inflammation pain) AND (Botulinum toxin type A OR BoNTA OR BTX OR BoNT)

**Embase:** (('fasciitis'/exp OR fasciitis OR fasciopathy OR 'chronic fasciitis' OR (chronic AND ('fasciitis'/exp OR fasciitis)) OR 'lumbar back fasciitis' OR (lumbar AND ('back'/exp OR back) AND ('fasciitis'/exp OR fasciitis)) OR 'neck'/exp OR neck) AND ('shoulder fasciitis' OR (('shoulder'/exp OR shoulder) AND ('fasciitis'/exp OR fasciitis))) OR 'plantar fasciitis'/exp OR 'plantar fasciitis' OR (plantar AND ('fasciitis'/exp OR fasciitis)) OR 'inflammation pain' OR (('inflammation'/exp OR inflammation) AND ('pain'/exp OR pain))) AND ('botulinum toxin type a'/exp OR 'botulinum toxin type a' OR (botulinum AND ('toxin'/exp OR toxin) AND type AND a) OR bonta OR 'btx'/exp OR btx OR bont)

**Cochrane Library:** [All text]( fasciitis OR fasciopathy OR chronic fasciitis OR lumbar back fasciitis OR neck and shoulder fasciitis OR Plantar fasciitis OR inflammation pain) AND (Botulinum toxin type A OR BoNTA OR BTX OR BoNT)

**Web of Science:** ( fasciitis OR fasciopathy OR chronic fasciitis OR lumbar back fasciitis OR neck and shoulder fasciitis OR Plantar fasciitis OR inflammation pain) AND (Botulinum toxin type A OR BoNTA OR BTX OR BoNT)
